# Supplementary material for: Flow Diverter Treatment of Ruptured Basilar Artery Perforator Aneurysms
Source: Springer Nature journal article supplement (doi:10.1007/s00062-021-01133-y), 2022-01-20
Supplement: MOESM1 [file 20051974]

**Samer Elsheikh <sup>1</sup>, Markus Möhlenbruch <sup>2</sup>, Fatih Seker <sup>2</sup>, Ansgar Berlis <sup>3</sup>, Christoph Maurer <sup>3</sup>, Naci Kocer <sup>4</sup>, Ala Jamous <sup>5</sup>, Daniel Behme <sup>5,6</sup>,  
Christian Taschner <sup>1</sup>, Horst Urbach <sup>1</sup>, Stephan Meckel <sup>7,1</sup>**

**Author Affiliations:**

1. Department of Neuroradiology, Medical Center – University of Freiburg, Faculty of Medicine, University of Freiburg, Germany.
2. Department of Neuroradiology, Heidelberg University Hospital, Germany.
3. Diagnostic and Interventional Neuroradiology, University Hospital Augsburg, Germany.
4. Department of Neuroradiology, Cerrahpasa Medical Faculty, Istanbul University-Cerrahpasa Istanbul, Turkey.
5. Institute of Neuroradiology, University Medical Center Goettingen, Goettingen, Germany.
6. University Clinic for Neuroradiology, Universtiy Hospital Magdeburg, Magdeburg Germany.
7. Institut für diagnostische und Interventionelle Neuroradiologie. RKH Klinikum Ludwigsburg, Ludwigsburg Germany

Corresponding Author:

Samer Elsheikh, M.D.

E-mail: [samer.elsheikh@uniklinik-freiburg.de](mailto:samer.elsheikh@uniklinik-freiburg.de)

**Supplementary Table 1: Individual Clinical and Angiographic Presentation of Patients**

| Pat. # | age   | Hunt and Hess Grade | Fisher Grade | Perimesencephalic pattern | Satti classification | Initial Diagnosis | Re-bleeding |
|--------|-------|---------------------|--------------|---------------------------|----------------------|-------------------|-------------|
| 1      | 70-79 | 1                   | 2            | yes                       | IIb                  | no                | Yes         |
| 2      | 40-49 | 2                   | 3            | no                        | III                  | yes / CTA         | No          |
| 3      | 70-79 | 1                   | 3            | yes                       | III                  | no                | Yes         |
| 4      | 50-59 | 3                   | 3            | no                        | IIa                  | no                | No          |
| 5      | 40-49 | 2                   | 4            | no                        | I                    | yes / CTA and DSA | No          |
| 6      | 60-69 | 2                   | 3            | no                        | IIb                  | no                | No          |
| 7      | 60-69 | 2                   | 3            | no                        | III                  | yes / DSA         | Yes         |
| 8      | 60-69 | 1                   | 4            | no                        | I                    | no                | No          |
| 9      | 70-79 | 3                   | 4            | no                        | III                  | yes / DSA         | Yes         |
| 10     | 50-59 | 4                   | 4            | no                        | IIb                  | no                | No          |
| 11     | 60-69 | 4                   | 4            | no                        | III                  | no                | No          |
| 12     | 50-59 | 3                   | 4            | no                        | IIb                  | yes / CTA         | No          |
| 13     | 50-59 | 1                   | 3            | no                        | IIb                  | no                | No          |
| 14     | 40-49 | 2                   | 3            | no                        | IIb                  | no                | No          |
| 15     | 40-49 | 2                   | 2            | no                        | IIb                  | no                | No          |
| 16     | 40-49 | 1                   | 1            | yes                       | IIb                  | no                | No          |
| 17     | 40-49 | 1                   | 2            | no                        | IIb                  | no                | No          |
| 18     | 50-59 | 2                   | 3            | no                        | I                    | no                | No          |
