# Supplementary material for: Flow Diverter Treatment of Ruptured Basilar Artery Perforator Aneurysms
Source: Springer Nature journal article supplement (doi:10.1007/s00062-021-01133-y), 2022-01-20
Supplement: MOESM3 [file 20051974]

**Samer Elsheikh <sup>1</sup>, Markus Möhlenbruch <sup>2</sup>, Fatih Seker <sup>2</sup>, Ansgar Berlis <sup>3</sup>, Christoph Maurer <sup>3</sup>, Naci Kocer <sup>4</sup>, Ala Jamous <sup>5</sup>, Daniel Behme <sup>5,6</sup>,  
Christian Taschner <sup>1</sup>, Horst Urbach <sup>1</sup>, Stephan Meckel <sup>7,1</sup>**

**Author Affiliations:**

1. Department of Neuroradiology, Medical Center – University of Freiburg, Faculty of Medicine, University of Freiburg, Germany.
2. Department of Neuroradiology, Heidelberg University Hospital, Germany.
3. Diagnostic and Interventional Neuroradiology, University Hospital Augsburg, Germany.
4. Department of Neuroradiology, Cerrahpasa Medical Faculty, Istanbul University-Cerrahpasa Istanbul, Turkey.
5. Institute of Neuroradiology, University Medical Center Goettingen, Goettingen, Germany.
6. University Clinic for Neuroradiology, Universtiy Hospital Magdeburg, Magdeburg Germany.
7. Institut für diagnostische und Interventionelle Neuroradiologie. RKH Klinikum Ludwigsburg, Ludwigsburg Germany.

Corresponding Author:

Samer Elsheikh, M.D.

E-mail: [samer.elsheikh@uniklinik-freiburg.de](mailto:samer.elsheikh@uniklinik-freiburg.de)

**Supplementary Table 3:** Causes and Outcomes of Ischemic Complications (acute and delayed)

| Patient # | Cause of Ischemic complication           | Stent Coating              | mRS at Discharge | mRS > 90 days |
|-----------|------------------------------------------|----------------------------|------------------|---------------|
| 1         | FD-related                               | low thrombogenicity coated | 4                | 1             |
| 3         | FD-related (delayed on day 43)           | low thrombogenicity coated | 0                | 1             |
| 7         | FD-related and Delayed cerebral ischemia | not coated                 | 1                | 1             |
| 9         | FD-related                               | not coated                 | 6                | 6             |
| 10        | FD-related                               | not coated                 | 5                | 2             |
| 12        | Delayed cerebral ischemia                | not coated                 | 6                | 6             |
